# Supplementary material for: Applying GIS and Machine Learning Methods to Twitter Data for Multiscale Surveillance of Influenza
Source: PLoS One. 2016 Jul 25;11(7):e0157734. doi: 10.1371/journal.pone.0157734 (PMC4959719; doi:10.1371/journal.pone.0157734)
Supplement: S1 File — (XLSX) [file pone.0157734.s001.xlsx]

## Sheet: EMERGENCY_ILI
WEEK	BOSTON	CHICAGO	COLUMBUS	CLEVELAND	SAN_DIEGO
36	2.48518	2.23348			1
37	3.03745	3.18737			1
38	5.04926	3.55961			2
39	6.19323	3.39675			2
40	7.73168	3.21063	18.2	1.6	1
41	5.48318	3.90859	17.6	1.2	1
42	5.79876	4.30411	18.1	1.4	1
43	5.48318	4.86248	18.9	1.9	4
44	4.93092	4.02492	18.8	1.5	2
45	4.97037	4.39717	19	2	3
46	4.61534	4.93227	19.7	1.8	2
47	4.02363	3.95513	18.9	2	1
48	3.58971	3.04777	19.8	1.8	1
49	4.65479	4.23431	20.1	2.1	2
50	7.92892	4.18778	19.4	2.8	3
51	6.42992	5.30452	19.4	3.2	3
52	4.497	6.21187	22.9	4.2	6
1	8.40228	7.93352	23.9	3.4	8
2	8.87565	8.49189	22.6	2.2	11
3	7.53444	6.90984	21.9	2	10
4	7.10052	5.56044	21.9		10
5	6.7455	5.39758	21.1		10
6	6.78494	4.97881
7	6.54826	3.93186
8	6.86384	4.18778
9	5.20705	3.97839
10	4.29976	3.97839

## Sheet: SENTINEL_ILI
WEEK	BOSTON	CHICAGO	CLEVELAND	COLUMBUS	DENVER	DETROIT	FORT_WORTH	NASHVILLE	NEW_YORK	SAN_DIEGO	SEATTLE
36							1.6	0
37							1.8	0.2
38							1.8	0
39							2	0
40	0.68		0	1.5			2.1	0.9		0.0888494	1
41	0.5	2.4	0	0.6			2	0.4	1.5	0.180424	1.1
42	0.74	2.5	0	0.3		0.1	2.1	0.7	1.5	0.220848	1.1
43	0.45	2.7	0	0.5		0.1	2.2	0.6	1.6	0.0518135	1.3
44	0.76	3	0.39	0.8		0.2	2.6	0.2	1.9	0.234412	1.1
45	0.95666	2.8	2.96	0.4		0	2.4	0	2.02	0.275356	1.3
46	0.93262	2.8	1.34	0.3		0.2	2.7	0.7	2.1	0.2792	1.2
47	0.68	3	0	0.9		0.2	3.1	0	2.1	0.497512	1.2
48	1.12	3.4	0.73	0.4		0.2	3.6	2.9	2.5	0.25663	1.2
49	1	3.5	0	0.26	1.5	0.4	4.2	0.8	2.7	0.142586	1.5
50	0.83	3.7	1.68	0.2	1.7	0.2	4.6	5.3	2.2	0.693161	1.5
51	1.01	3.9	3.22	0.36	2.5	1	6.8	7.1	3	0.689995	2.4
52	1.68	5.7	4.76	0.2	3.3	1.9	10	0	3.7	0.227273	3.5
1	1.66	5.4	2.81	0.35	3	0.8	9.6	6.8	3.7	0.18018	3.3
2	0.73	4.2	0.86	0.44	2.63	1.3	10	10.1	3	1.28617	4.3
3	1.25	3.5	2.19	0.38	2.1	1.2	8.8	4.2	3.3	3.05052	3.5
4	0.81	3.2	2.11	0.38	1.9	1.6	8.1	4.4	3.2	2.13836	3
5	1.43	2.6	1.08	0.52	1.9	0.6	6.9	1.6	2.7	2.05882	2.4
6	1.47	2.5	2.49	0.39	1.7	0.5	5.4	1.4	2.7	1.91388	2.1
7	1.01	2.6	0	0.46	1.4	0.7	5	1.1	2.5	0.949367	2.3
8	1.08	2.8	0.93	0.21	1.1	0.3	4.6	2.5	2.4	0.672043	2
9	1.11	3	0	0.2	1.2	0.2	4.7	0.9	2.1	0.528169	1.5
10

## Sheet: REGIONAL_ILI
WEEK	REGION_1	REGION_2	REGION_3	REGION_4	REGION_5	REGION_6	REGION_7	REGION_8	REGION_9	REGION_10
40	0.621395	1.61857	0.925185	0.935188	0.889301	2.12184	0.649922	0.688313	1.38107	0.429608
41	0.653742	1.66925	1.0641	0.996551	1.03398	2.23693	0.847939	0.735472	1.62177	0.405647
42	0.741983	1.93917	1.04122	1.02066	0.974892	2.43559	0.708532	0.64483	1.62612	0.511438
43	0.80209	1.6789	1.12822	1.22506	1.11201	2.36749	0.912147	0.811174	1.61859	0.513327
44	0.905562	2.00446	1.10291	1.2874	1.17611	2.51013	0.796841	0.716373	1.815	0.535649
45	0.955454	1.76133	1.12022	1.47928	1.19015	2.90984	0.893902	0.751288	2.07706	0.379759
46	0.851659	1.51459	1.25802	1.48479	1.1304	3.3118	0.864878	0.696611	2.05941	0.503713
47	0.692778	1.83179	1.18186	1.68954	1.16276	3.70307	1.03842	0.954895	1.99246	0.469309
48	0.920286	2.02611	1.51262	2.15942	1.5952	4.39307	1.12085	0.996509	2.38855	0.680224
49	0.825554	2.02363	1.51479	2.26793	1.48542	4.94815	1.25664	1.52768	2.15989	0.653257
50	1.06768	1.77828	1.60163	2.36923	1.68481	5.60913	1.52616	1.60372	2.55069	0.860692
51	1.1724	2.23377	2.23603	3.23084	2.08663	8.0086	2.80787	2.00255	2.98617	1.50751
52	1.58812	2.93452	3.30549	4.62858	3.55135	9.86512	4.4809	3.66531	4.57373	3.58097
1	1.60948	3.33508	3.59339	3.88852	3.34612	8.67157	4.06436	2.96421	4.61831	3.99164
2	1.39198	2.746	3.20573	3.07637	2.72569	6.94124	3.04754	2.56835	4.20594	3.36928
3	1.67317	3.07585	3.36055	2.84334	2.49368	5.77555	3.06195	2.25578	4.25656	2.75802
4	1.87667	2.96343	3.47533	2.92607	2.58409	5.29662	2.95351	2.09538	4.7171	2.40345
5	2.0308	3.30282	3.03374	2.66769	2.18657	5.17586	2.7559	1.78839	4.01079	1.7524
6	2.24365	3.43908	2.79873	2.15083	2.00296	4.57382	2.0535	1.76997	3.59812	1.59128
7	1.75096	3.12539	2.39368	1.97209	1.86057	3.76851	1.59839	1.50413	3.25524	1.23503
8	1.78771	2.38961	2.04193	1.52728	1.96852	3.77623	1.38378	1.51219	3.15769	1.29149
9	1.51318	2.29816	1.97427	1.35391	1.7786	3.60129	1.19648	1.23372	2.84636	0.663587
10	1.53377	2.34044	1.76977	1.3532	1.69722	3.44324	1.09709	1.37567	2.55039	0.828104

## Sheet: NATIONAL_ILI
WEEK	NATIONAL
40	1.15599
41	1.27415
42	1.31784
43	1.37141
44	1.47101
45	1.57918
46	1.59292
47	1.7182
48	2.10559
49	2.16042
50	2.37386
51	3.18281
52	4.59114
1	4.30265
2	3.58441
3	3.38269
4	3.3976
5	3.14135
6	2.81622
7	2.46878
8	2.26933
9	2.03862
10	1.95219
